# Supplementary material for: Is adaptation limited by mutation? A timescale-dependent effect of genetic diversity on the adaptive substitution rate in animals
Source: bioRxiv or medRxiv preprint supplement (doi:10.1101/643619), 2019-08-12
Supplement: Supplementary file [file media-1.pdf]

| Species                      | Bioproject                | data_type      | #individuals | publication                       | Reference genome                                                                                                                                    |
|------------------------------|---------------------------|----------------|--------------|-----------------------------------|-----------------------------------------------------------------------------------------------------------------------------------------------------|
| <i>Gorilla gorilla</i>       | PRJNA189439               | Genome         | 20           | Prado-Martinez et al. 2013        | Ensembl (release 89)                                                                                                                                |
| <i>Homo sapiens</i>          | PRJEB8350                 | Exome          | 19           | Teixeira et al. 2015              | Ensembl (release 89)                                                                                                                                |
| <i>Pan troglodytes</i>       | PRJEB8350                 | Exome          | 20           | Teixeira et al. 2015              | Ensembl (release 89)                                                                                                                                |
| <i>Papio anubis</i>          | PRJNA54005                | Genome         | 5            | unpublished baboon genome project | Ensembl (release 89)                                                                                                                                |
| <i>Pongo abelii</i>          | PRJNA189439 and PRJEB1675 | Genome         | 10           | Prado-Martinez et al. 2013        | Ensembl (release 89)                                                                                                                                |
| <i>Macaca mulatta</i>        | PRJNA251548               | Exome          | 20           | Xue et al. 2016                   | Ensembl (release 89)                                                                                                                                |
| <i>Meleagris gallopavo</i>   | PRJNA271731               | RNA-seq        | 10           | Wright et al. 2015                | NA                                                                                                                                                  |
| <i>Phasianus colchicus</i>   | PRJNA271731               | RNA-seq        | 11           | Wright et al. 2015                | NA                                                                                                                                                  |
| <i>Pavo cristatus</i>        | PRJNA271731               | RNA-seq        | 10           | Wright et al. 2015                | NA                                                                                                                                                  |
| <i>Numida meleagris</i>      | PRJNA271731               | RNA-seq        | 7            | Wright et al. 2015                | NA                                                                                                                                                  |
| <i>Anas platyrhynchos</i>    | PRJNA271731               | RNA-seq        | 10           | Wright et al. 2015                | NA                                                                                                                                                  |
| <i>Anser cygnoides</i>       | PRJNA271731               | RNA-seq        | 10           | Wright et al. 2015                | NA                                                                                                                                                  |
| <i>Ficedula albicollis</i>   | PRJEB2984                 | Genome         | 20           | Ellegren et al. 2012              | NCBI FicAlb1.5                                                                                                                                      |
| <i>Geospiza difficilis</i>   | PRJNA263122               | Genome         | 8            | Lamichhaney et al. 2015           | NCBI Geofor1.0                                                                                                                                      |
| <i>Parus major</i>           | PRJNA381923               | Genome         | 10           | Corcoran et al. 2017              | //ftp.ncbi.nlm.nih.gov/genomes/all/GCF/001/522/545/GCF_001522545.2_Parus_major1.1/GCF_001522545.2_Parus_major1.1_genomic.gff.gz                     |
| <i>Corvus sp.</i>            | PRJEB9057                 | Genome         | 10           | Vijay et al. 2017                 | //ftp.ncbi.nlm.nih.gov/genomes/all/GCF/000/738/735/GCF_000738735.2_ASM73873v2/GCF_000738735.2_ASM73873v2_genomic.gff.gz                             |
| <i>Taniopygia guttata</i>    | PRJEB10586                | Genome         | 20           | Singhal et al. 2016               | //ftp.ncbi.nlm.nih.gov/genomes/all/GCF/000/151/805/GCF_000151805.1_Taniopygia_guttata-3.2.4/GCF_000151805.1_Taniopygia_guttata-3.2.4_genomic.gff.gz |
| <i>Maniola jurtina</i>       | PRJNA530965               | target capture | 20           | newly generated                   | NA                                                                                                                                                  |
| <i>Melanargia galathea</i>   | PRJNA530965               | target capture | 10           | newly generated                   | NA                                                                                                                                                  |
| <i>Aphantopus hyperantus</i> | PRJNA530965               | target capture | 7            | newly generated                   | NA                                                                                                                                                  |
| <i>Pyronia tithonus</i>      | PRJNA530965               | target capture | 7            | newly generated                   | NA                                                                                                                                                  |
| <i>Pyronia bathseba</i>      | PRJNA530965               | target capture | 8            | newly generated                   | NA                                                                                                                                                  |

|                                    |             |                |    |                         |                                                                                                                                                                                                                                                                                                                       |
|------------------------------------|-------------|----------------|----|-------------------------|-----------------------------------------------------------------------------------------------------------------------------------------------------------------------------------------------------------------------------------------------------------------------------------------------------------------------|
| <i>Formica sanguinea</i>           | PRJNA530965 | target capture | 10 | newly generated         | NA                                                                                                                                                                                                                                                                                                                    |
| <i>Formica cunicularia</i>         | PRJNA530965 | target capture | 6  | newly generated         | NA                                                                                                                                                                                                                                                                                                                    |
| <i>Formica pratensis</i>           | PRJNA530965 | target capture | 8  | newly generated         | NA                                                                                                                                                                                                                                                                                                                    |
| <i>Formica fusca</i>               | PRJNA530965 | target capture | 8  | newly generated         | NA                                                                                                                                                                                                                                                                                                                    |
| <i>Allolobophora chlorotica L1</i> | PRJNA530965 | target capture | 19 | newly generated         | NA                                                                                                                                                                                                                                                                                                                    |
| <i>Allolobophora chlorotica L2</i> | PRJNA530965 | target capture | 8  | newly generated         | NA                                                                                                                                                                                                                                                                                                                    |
| <i>Allolobophora chlorotica L4</i> | PRJNA530965 | target capture | 9  | newly generated         | NA                                                                                                                                                                                                                                                                                                                    |
| <i>Aporrectodea icterica</i>       | PRJNA530965 | target capture | 10 | newly generated         | NA                                                                                                                                                                                                                                                                                                                    |
| <i>Lumbricus terrestris</i>        | PRJNA530965 | target capture | 9  | newly generated         | NA                                                                                                                                                                                                                                                                                                                    |
| <i>Lineus lacteus</i>              | PRJNA530965 | target capture | 9  | newly generated         | NA                                                                                                                                                                                                                                                                                                                    |
| <i>Lineus sanguineus</i>           | PRJNA530965 | target capture | 9  | newly generated         | NA                                                                                                                                                                                                                                                                                                                    |
| <i>Lineus longissimus</i>          | PRJNA530965 | target capture | 6  | newly generated         | NA                                                                                                                                                                                                                                                                                                                    |
| <i>Lineus ruber</i>                | PRJNA530965 | target capture | 8  | newly generated         | NA                                                                                                                                                                                                                                                                                                                    |
| <i>Mytilus galloprovincialis</i>   | PRJNA530965 | target capture | 9  | newly generated         | NA                                                                                                                                                                                                                                                                                                                    |
| <i>Mytilus californianus</i>       | PRJNA530965 | target capture | 16 | newly generated         | NA                                                                                                                                                                                                                                                                                                                    |
| <i>Mytilus edulis</i>              | PRJNA530965 | target capture | 10 | newly generated         | NA                                                                                                                                                                                                                                                                                                                    |
| <i>Mytilus trossulus</i>           | PRJNA530965 | target capture | 10 | newly generated         | NA                                                                                                                                                                                                                                                                                                                    |
| <i>Drosophila melanogaster</i>     | SRP006733   | Genome         | 10 | Pool et al. 2012        | <a href="ftp://ftp.ncbi.nlm.nih.gov/genomes/all/GCF/000/001/215/GCF_000001215.4_Release_6_plus_ISO1_MT/GCF_000001215.4_Release_6_plus_ISO1_MT_genomic.fna.gz">ftp://ftp.ncbi.nlm.nih.gov/genomes/all/GCF/000/001/215/GCF_000001215.4_Release_6_plus_ISO1_MT/GCF_000001215.4_Release_6_plus_ISO1_MT_genomic.fna.gz</a> |
| <i>Drosophila sechellia</i>        | PRJNA395473 | Genome         | 8  | Schrider et al. 2018    | <a href="ftp://ftp.ncbi.nlm.nih.gov/genomes/all/GCF/000/005/215/GCF_000005215.3_dsec_caf1/GCF_000005215.3_dsec_caf1_genomic.fna.gz">ftp://ftp.ncbi.nlm.nih.gov/genomes/all/GCF/000/005/215/GCF_000005215.3_dsec_caf1/GCF_000005215.3_dsec_caf1_genomic.fna.gz</a>                                                     |
| <i>Drosophila simulans</i>         | PRJNA215932 | Genome         | 10 | Rogers et al. 2014      | <a href="ftp://ftp.ncbi.nlm.nih.gov/genomes/all/GCF/000/754/195/GCF_000754195.2_ASM75419v2/GCF_000754195.2_ASM75419v2_genomic.fna.gz">ftp://ftp.ncbi.nlm.nih.gov/genomes/all/GCF/000/754/195/GCF_000754195.2_ASM75419v2/GCF_000754195.2_ASM75419v2_genomic.fna.gz</a>                                                 |
| <i>Drosophila santomea</i>         | PRJNA395473 | Genome         | 17 | Turissini & Matute 2017 | <a href="ftp://ftp.ncbi.nlm.nih.gov/genomes/all/GCF/000/005/975/GCF_000005975.2_dyak_caf1/GCF_000005975.2_dyak_caf1_genomic.fna.gz">ftp://ftp.ncbi.nlm.nih.gov/genomes/all/GCF/000/005/975/GCF_000005975.2_dyak_caf1/GCF_000005975.2_dyak_caf1_genomic.fna.gz</a>                                                     |
| <i>Drosophila yakuba</i>           | PRJNA395473 | Genome         | 20 | Turissini & Matute 2017 | <a href="ftp://ftp.ncbi.nlm.nih.gov/genomes/all/GCF/000/005/975/GCF_000005975.2_dyak_caf1/GCF_000005975.2_dyak_caf1_genomic.fna.gz">ftp://ftp.ncbi.nlm.nih.gov/genomes/all/GCF/000/005/975/GCF_000005975.2_dyak_caf1/GCF_000005975.2_dyak_caf1_genomic.fna.gz</a>                                                     |
| <i>Drosophila teissieri</i>        | PRJNA395473 | Genome         | 11 | Turissini & Matute 2017 | <a href="ftp://ftp.ncbi.nlm.nih.gov/genomes/all/GCF/000/005/975/GCF_000005975.2_dyak_caf1/GCF_000005975.2_dyak_caf1_genomic.fna.gz">ftp://ftp.ncbi.nlm.nih.gov/genomes/all/GCF/000/005/975/GCF_000005975.2_dyak_caf1/GCF_000005975.2_dyak_caf1_genomic.fna.gz</a>                                                     |

|                               |             |         |    |                       |                                                                                                                                 |
|-------------------------------|-------------|---------|----|-----------------------|---------------------------------------------------------------------------------------------------------------------------------|
| <i>Mus musculus castaneus</i> | PRJEB2176   | Genome  | 10 | Harr et al. 2016      | ftp://ftp.ncbi.nlm.nih.gov/genomes/all/GCF/000/001/635/GCF_000001635.26_GRCm38.p6/GCF_000001635.26_GRCm38.p6_genomic.fna.gz     |
| <i>Mus spretus</i>            | PRJEB11742  | Genome  | 8  | Harr et al. 2016      | ftp://ftp.ncbi.nlm.nih.gov/genomes/all/GCA/001/624/865/GCA_001624865.1_SPRET_Eij_v1/GCA_001624865.1_SPRET_Eij_v1_genomic.fna.gz |
| <i>Rattus norvegicus</i>      | PRJEB2922   | Genome  | 12 | Deinum et al. 2015    | ftp://ftp.ncbi.nlm.nih.gov/genomes/all/GCF/000/001/895/GCF_000001895.5_Rnor_6.0/GCF_000001895.5_Rnor_6.0_genomic.fna.gz         |
| <i>Microtus ochrogaster</i>   | PRJNA428754 | RNA-seq | 18 | NA                    | NA                                                                                                                              |
| <i>Microtus arvalis</i>       | PRJNA249058 | RNA-seq | 7  | Romiguier et al. 2014 | NA                                                                                                                              |

## References :

- Corcoran P, Gossman TI, Barton HJ, Great Tit HapMap Consortium, Slate J, Zeng K. 2017. Determinants of the efficacy of natural selection on coding and noncoding variability in two passerine species. *Genome biology and evolution*. 9:2987-3007.
- Deinum EE, Halligan DL, Ness RW, Zhang YH, Cong L, Zhang JX, Keightley PD. 2015. Recent evolution in *Rattus norvegicus* is shaped by declining effective population size. *Molecular biology and evolution*. 32:2547-58.
- Ellegren H, Smeds L, Burri R, Olason PI, Backström N, Kawakami T, Künstner A, Mäkinen H, Nadachowska-Brzyska K, Qvarnström A, et al. 2012. The genomic landscape of species divergence in *Ficedula* flycatchers. *Nature* 491:756–760.
- Harr B, Karakoc E, Neme R, Teschke M, Pfeifle C, Pezer Ž, Babiker H, Linnenbrink M, Montero I, Scavetta R, Abai MR. 2016. Genomic resources for wild populations of the house mouse, *Mus musculus* and its close relative *Mus spretus*. *Scientific data*. 3:160075.
- Kim J-M, Santure AW, Barton HJ, Quinn JL, Cole EF, Great Tit HapMap Consortium, Visser ME, Sheldon BC, Groenen MAM, van Oers K, et al. 2018. A high-density SNP chip for genotyping great tit (*Parus major*) populations and its application to studying the genetic architecture of exploration behaviour. *Molecular Ecology Resources* 18:877–891.
- Lamichhaney S, Berglund J, Almén MS, Maqbool K, Grabherr M, Martinez-Barrio A, Promerová M, Rubin C-J, Wang C, Zamani N, et al. 2015. Evolution of Darwin’s finches and their beaks revealed by genome sequencing. *Nature* 518:371–375.
- Pool JE, Corbett-Detig RB, Sugino RP, Stevens KA, Cardeno CM, Crepeau MW, Duchon P, Emerson JJ, Saelao P, Begun DJ, Langley CH. 2012. Population genomics of sub-Saharan *Drosophila melanogaster*: African diversity and non-African admixture. *PLoS genetics*. 8(12):e1003080.
- Prado-Martinez J, Sudmant PH, Kidd JM, Li H, Kelley JL, Lorente-Galdos B, Veeramah KR, Woerner AE, O’Connor TD, Santpere G. 2013. Great ape genetic diversity and population history. *Nature* 499:471.
- Teixeira JC, de Filippo C, Weihmann A, Meneu JR, Racimo F, Dannemann M, Nickel B, Fischer A, Halbwax M, Andre C. 2015. Long-term balancing selection in LAD1 maintains a missense trans-species polymorphism in humans, chimpanzees, and bonobos. *Molecular biology and evolution* 32:1186–1196.

- Rogers RL, Cridland JM, Shao L, Hu TT, Andolfatto P, Thornton KR. 2014. Landscape of standing variation for tandem duplications in *Drosophila yakuba* and *Drosophila simulans*. *Molecular Biology and Evolution*. 31:1750–1766.
- Romiguier J, Gayral P, Ballenghien M, Bernard A, Cahais V, Chenuil A, Chiari Y, Dernat R, Duret L, Faivre N, Loire E. et al. 2014. Comparative population genomics in animals uncovers the determinants of genetic diversity. *Nature* 515:261.
- Schrider DR, Ayroles J, Matute DR, Kern AD. 2018. Supervised machine learning reveals introgressed loci in the genomes of *Drosophila simulans* and *D. sechellia*. *PLoS genetics*. 4(4):e1007341.
- Turissini DA, Matute DR. 2017. Fine scale mapping of genomic introgressions within the *Drosophila yakuba* clade. *PLoS genetics*. 13(9):e1006971.
- Vijay N, Weissensteiner M, Burri R, Kawakami T, Ellegren H, Wolf JBW. 2017. Genome-wide signatures of genetic variation within and between populations - a comparative perspective. Available from: <http://biorxiv.org/lookup/doi/10.1101/104604>
- Wright AE, Harrison PW, Zimmer F, Montgomery SH, Pointer MA, Mank JE. 2015. Variation in promiscuity and sexual selection drives avian rate of Faster-Z evolution. *Molecular ecology* 24:1218–1235.

**Table S1 : Details of the species used in this study and numbers of individuals for each species.**

| Taxonomic group | minimum orthogroup number | maximum orthogroup number |
|-----------------|---------------------------|---------------------------|
| ants            | 1249                      | 1261                      |
| butterflies     | 1561                      | 1671                      |
| earth worms     | 796                       | 1460                      |
| Ribbon worms    | 1049                      | 1413                      |
| mussels         | 1525                      | 1525                      |
| primates        | 8604                      | 8604                      |
| passerines      | 6755                      | 6755                      |
| fowls           | 4439                      | 4439                      |
| rodents         | 3994                      | 3994                      |
| flies           | 7900                      | 7900                      |

**Table S2: Number of orthogroups for each taxonomic group.**

The differences in terms of number of orthogroups comes from the fact that we not only kept orthogroups with all species but also orthogroups with all species but one to estimate dN/dS value for each terminal branches in order to maximize the number of substitutions for data sets generated by exon capture.

| species                     | Number of individuals | Chosen sample size | # non-synonymous SNPs | # synonymous SNPs | # SNPs total | #GC-cons, Non-synonymous SNPs | #GC-cons, Synonymous SNPs | #GC-cons, SNPs total |
|-----------------------------|-----------------------|--------------------|-----------------------|-------------------|--------------|-------------------------------|---------------------------|----------------------|
| <i>F. fusca</i>             | 8                     | 10                 | 4278                  | 6578              | 10856        | 270                           | 166                       | 436                  |
| <i>F. sanguinea</i>         | 10                    | 16                 | 3242                  | 5343              | 8585         | 363                           | 224                       | 587                  |
| <i>F. cunicularia</i>       | 6                     | 8                  | 4035                  | 6355              | 10390        | 212                           | 121                       | 333                  |
| <i>F. pratensis</i>         | 8                     | 12                 | 1773                  | 2235              | 4008         | 191                           | 87                        | 278                  |
| <i>M. galathea</i>          | 10                    | 10                 | 1190                  | 3309              | 4499         | 621                           | 346                       | 966                  |
| <i>M. jurtina</i>           | 20                    | 32                 | 7310                  | 15926             | 23235        | 1863                          | 2036                      | 3898                 |
| <i>A. hyperanthus</i>       | 7                     | 8                  | 1441                  | 2385              | 3826         | 734                           | 350                       | 1084                 |
| <i>P. tithonus</i>          | 7                     | 10                 | 1534                  | 2372              | 3906         | 369                           | 278                       | 647                  |
| <i>P. bathseba</i>          | 8                     | 10                 | 1611                  | 2676              | 4287         | 395                           | 315                       | 710                  |
| <i>M. californianus</i>     | 16                    | 24                 | 6370                  | 13436             | 19806        | 1467                          | 2209                      | 3675                 |
| <i>M. trossulus</i>         | 10                    | 14                 | 6329                  | 18994             | 25323        | 1665                          | 3382                      | 5047                 |
| <i>M. galloprovincialis</i> | 9                     | 12                 | 3298                  | 9089              | 12387        | 839                           | 1665                      | 2504                 |
| <i>M. edulis</i>            | 10                    | 12                 | 5497                  | 15987             | 21485        | 1326                          | 2590                      | 3915                 |
| <i>A. chlorotica L1</i>     | 19                    | 26                 | 1751                  | 3094              | 4845         | 472                           | 442                       | 914                  |
| <i>A. chlorotica L2</i>     | 8                     | 8                  | 350                   | 554               | 904          | 69                            | 56                        | 126                  |
| <i>A. chlorotica L4</i>     | 9                     | 12                 | 3562                  | 7895              | 11457        | 701                           | 808                       | 1508                 |
| <i>A. icterica</i>          | 10                    | 12                 | 1657                  | 3778              | 5435         | 360                           | 387                       | 747                  |
| <i>L. terrestris</i>        | 9                     | 8                  | 238                   | 940               | 1178         | 38                            | 77                        | 115                  |
| <i>L. lacteus</i>           | 9                     | 12                 | 5896                  | 20421             | 26317        | 1292                          | 2495                      | 3788                 |
| <i>L. longissimus</i>       | 6                     | 8                  | 55                    | 99                | 154          | 11                            | 7                         | 18                   |
| <i>L. sanguineus</i>        | 9                     | 10                 | 954                   | 3248              | 4202         | 192                           | 397                       | 589                  |
| <i>L. ruber</i>             | 8                     | 12                 | 1028                  | 1691              | 2718         | 196                           | 168                       | 364                  |
| <i>H. sapiens</i>           | 19                    | 28                 | 2281                  | 2812              | 5093         | 264                           | 123                       | 387                  |
| <i>P. troglodytes</i>       | 20                    | 30                 | 4744                  | 6558              | 11302        | 559                           | 266                       | 825                  |
| <i>G. gorilla</i>           | 20                    | 30                 | 3649                  | 4842              | 8491         | 370                           | 180                       | 550                  |
| <i>P. anubis</i>            | 5                     | 8                  | 2038                  | 4006              | 6044         | 242                           | 164                       | 407                  |
| <i>P. abelii</i>            | 10                    | 16                 | 5687                  | 9300              | 14987        | 594                           | 360                       | 954                  |
| <i>M. mulatta</i>           | 19                    | 28                 | 5257                  | 9976              | 15232        | 608                           | 560                       | 1169                 |
| <i>A. platyrhynchos</i>     | 10                    | 16                 | 3796                  | 13089             | 16884        | 206                           | 438                       | 645                  |
| <i>A. cygnoides</i>         | 10                    | 14                 | 1296                  | 4824              | 6119         | 103                           | 127                       | 230                  |
| <i>M. gallopavo</i>         | 10                    | 10                 | 1005                  | 3791              | 4795         | 61                            | 52                        | 113                  |
| <i>N. meleagris</i>         | 10                    | 16                 | 1319                  | 6241              | 7560         | 90                            | 135                       | 224                  |
| <i>P. cristatus</i>         | 10                    | 14                 | 602                   | 2214              | 2816         | 48                            | 51                        | 99                   |
| <i>P. colchicus</i>         | 11                    | 14                 | 3051                  | 9703              | 12754        | 172                           | 172                       | 343                  |
| <i>P. major</i>             | 10                    | 16                 | 6906                  | 14414             | 21320        | 2702                          | 2292                      | 4994                 |
| <i>F. albicollis</i>        | 20                    | 16                 | 16242                 | 20681             | 36923        | 2818                          | 2224                      | 5042                 |
| <i>Corvus sp.</i>           | 10                    | 14                 | 817                   | 1355              | 2172         | 115                           | 83                        | 197                  |
| <i>G. difficilis</i>        | 8                     | 10                 | 2090                  | 3280              | 5370         | 374                           | 232                       | 606                  |
| <i>T. guttata</i>           | 20                    | 16                 | 36318                 | 102249            | 138567       | 6588                          | 7775                      | 14363                |
| <i>R. norvegicus</i>        | 12                    | 18                 | 5023                  | 10224             | 15246        | 645                           | 574                       | 1220                 |
| <i>M. arvalis</i>           | 7                     | 10                 | 1783                  | 6351              | 8134         | 232                           | 377                       | 609                  |
| <i>M. ochrogaster</i>       | 18                    | 18                 | 2455                  | 5340              | 7795         | 448                           | 354                       | 801                  |
| <i>M. spretus</i>           | 8                     | 12                 | 58687                 | 14289             | 72976        | 812                           | 921                       | 1733                 |
| <i>M. m. castaneus</i>      | 10                    | 12                 | 5524                  | 17996             | 23520        | 778                           | 1068                      | 1846                 |
| <i>D. melanogaster</i>      | 10                    | 16                 | 36213                 | 138306            | 174518       | 9574                          | 15862                     | 25436                |
| <i>D. teissieri</i>         | 11                    | 18                 | 48565                 | 247605            | 296171       | 14259                         | 35930                     | 50188                |
| <i>D. santomea</i>          | 17                    | 28                 | 16104                 | 54878             | 70982        | 2374                          | 4142                      | 6516                 |
| <i>D. yakuba</i>            | 20                    | 12                 | 37921                 | 164003            | 201924       | 11090                         | 22635                     | 33725                |
| <i>D. simulans</i>          | 10                    | 16                 | 74864                 | 352964            | 427828       | 21397                         | 47094                     | 68490                |
| <i>D. sechellia</i>         | 8                     | 12                 | 379                   | 591               | 970          | 92                            | 61                        | 153                  |

**Table S3: SNPs counts for each species.**

| taxonomic group       | tree topologies references                                                                                                                                                                                                                                                   |
|-----------------------|------------------------------------------------------------------------------------------------------------------------------------------------------------------------------------------------------------------------------------------------------------------------------|
| Catarrhine primates   | Perelman P, Johnson WE, Roos C, Seuánez HN, Horvath JE, Moreira MA, Kessing B, Pontius J, Roelke M, Rumpler Y, Schneider MP. 2011. A molecular phylogeny of living primates. <i>PLoS genetics</i> . 7(3):e1001342.                                                           |
| Galloanserae          | Wright AE, Harrison PW, Zimmer F, Montgomery SH, Pointer MA, Mank JE. 2015. Variation in promiscuity and sexual selection drives avian rate of Faster-Z evolution. <i>Molecular ecology</i> . 24(6):1218-35.                                                                 |
| Passeriformes         | Barker FK, Barrowclough GF, Groth JG. 2002. A phylogenetic hypothesis for passerine birds: taxonomic and biogeographic implications of an analysis of nuclear DNA sequence data. <i>Proceedings of the Royal Society B: Biological Sciences</i> 269:295–308.                 |
| Muroidea              | Steppan SJ, Adkins RM, Anderson J, Thorne J. 2004. Phylogeny and Divergence-Date Estimates of Rapid Radiations in Muroid Rodents Based on Multiple Nuclear Genes. <i>Systematic Biology</i> 53:533–553.                                                                      |
| Mussels               | Distel DL. 2000. Phylogenetic Relationships among Mytilidae (Bivalvia): 18S rRNA Data Suggest Convergence in Mytilid Body Plans. <i>Molecular Phylogenetics and Evolution</i> 15:25–33.                                                                                      |
| Satyrinae butterflies | Peña C, Wahlberg N, Weingartner E, Kodandaramaiah U, Nylin S, Freitas AV, Brower AV. 2006. Higher level phylogeny of Satyrinae butterflies (Lepidoptera: Nymphalidae) based on DNA sequence data. <i>Molecular phylogenetics and evolution</i> . 40(1):29-49.                |
| Formica ants          | J. Romiguier, J. Rolland, C. Morandin, L. Keller. 2018. Phylogenomics of palearctic Formica species suggests a single origin of temporary parasitism and gives insights to the evolutionary pathway toward slave-making behaviour. <i>BMC evolutionary biology</i> 18(1):40. |
| Earth worms           | R. A. King, A. L. Tibble, W. O. C. Symondson. 2008. Opening a can of worms: unprecedented sympatric cryptic diversity within British lumbricid earthworms. <i>Molecular Ecology</i> 17, 4684-4698.                                                                           |
| Nemertea              | Thollesson, Mikael, and Jon L. Norenburg. 2003. Ribbon worm relationships: a phylogeny of the phylum Nemertea. <i>Proceedings of the Royal Society of London B: Biological Sciences</i> 27(1513): 407-415.                                                                   |
| Drosophila            | Obbard DJ, Maclennan J, Kim KW, Rambaut A, O'grady PM, Jiggins FM. 2012. Estimating divergence dates and substitution rates in the Drosophila phylogeny. <i>Molecular Biology and Evolution</i> . 29(11):3459-73.                                                            |

**Table S4 : Sources of the tree topologies of each taxonomic group used to estimate branch length and map substitutions.**

| <b>Species</b>                     | <b>Propagule size (cm)</b> | <b>source</b>                      |
|------------------------------------|----------------------------|------------------------------------|
| <i>Formica fusca</i>               | 14                         | Forel 1890                         |
| <i>Formica sanguinea</i>           | 10                         | Forel 1909                         |
| <i>Formica cunicularia</i>         | 8.5                        | Collingwood 1979                   |
| <i>Formica pratensis</i>           | 10.4                       | Bolton 1995                        |
| <i>Melanargia galathea</i>         | 0.102                      | García-Barros 2000                 |
| <i>Maniola jurtina</i>             | 0.0535                     | García-Barros 2000                 |
| <i>Aphantopus hyperantus</i>       | 0.0792                     | García-Barros 2000                 |
| <i>Pyronia tithonus</i>            | 0.0628                     | García-Barros 2000                 |
| <i>Pyronia bathseba</i>            | 0.0802                     | García-Barros 2000                 |
| <i>Mytilus californianus</i>       | 0.01                       | Bayne et al. 1983                  |
| <i>Mytilus trossulus</i>           | 0.01                       | Bayne et al. 1983                  |
| <i>Mytilus galloprovincialis</i>   | 0.01                       | Bayne et al. 1983                  |
| <i>Mytilus edulis</i>              | 0.01                       | Bayne et al. 1983                  |
| <i>Allolobophora chlorotica L1</i> | 0.0238                     | Eijsackers 2011                    |
| <i>Allolobophora chlorotica L2</i> | 0.0238                     | Eijsackers 2011                    |
| <i>Allolobophora chlorotica L4</i> | 0.0238                     | Eijsackers 2011                    |
| <i>Aporrecta icterica</i>          | 0.0411                     | Eijsackers 2011                    |
| <i>Lumbricus terrestris</i>        | 0.5                        | Cloudsley-Thompson and Sankey 1961 |
| <i>Lineus lacteus</i>              | 0.02                       | Bierne, 1983                       |
| <i>Lineus longissimus</i>          | 0.02                       | Bierne, 1983                       |
| <i>Lineus sanguineus</i>           | 0.02                       | Bierne, 1983                       |
| <i>Lineus ruber</i>                | 0.5                        | Bierne, 1983                       |
| <i>Homo sapiens</i>                | 93.4                       | De Magalhaes and Costa 2009        |
| <i>Pan troglodytes</i>             | 45.12                      | De Magalhaes and Costa 2009        |
| <i>Gorilla gorilla</i>             | 78                         | De Magalhaes and Costa 2009        |
| <i>Papio anubis</i>                | 55.95                      | De Magalhaes and Costa 2009        |
| <i>Pongo abelii</i>                | 42.48                      | De Magalhaes and Costa 2009        |
| <i>Macaca mulatta</i>              | 31.1                       | De Magalhaes and Costa 2009        |
| <i>Anas platyrhynchos</i>          | 55                         | Del Hoyo et al. 1992               |
| <i>Anser cygnoides</i>             | 87                         | Del Hoyo et al. 1992               |
| <i>Meleagris gallopavo</i>         | 90                         | Del Hoyo et al. 1992               |
| <i>Numida meleagris</i>            | 53                         | Del Hoyo et al. 1992               |
| <i>Pavo cristatus</i>              | 95                         | Del Hoyo et al. 1992               |
| <i>Phasianus colchicus</i>         | 57.5                       | Del Hoyo et al. 1992               |



|                                |        |                                           |
|--------------------------------|--------|-------------------------------------------|
| <i>Parus major</i>             | 13.5   | Del Hoyo et al. 1992                      |
| <i>Ficedula albicollis</i>     | 13     | Del Hoyo et al. 1992                      |
| <i>Corvus sp.</i>              | 50.5   | Del Hoyo et al. 1992                      |
| <i>Geospiza difficilis</i>     | 11.5   | Del Hoyo et al. 1992                      |
| <i>Taniopygia guttata</i>      | 10     | Del Hoyo et al. 1992                      |
| <i>Rattus norvegicus</i>       | 13.717 | De Magalhaes and Costa 2009               |
| <i>Microtus arvalis</i>        | 7.184  | De Magalhaes and Costa 2009               |
| <i>Microtus ochrogaster</i>    | 10.6   | De Magalhaes and Costa 2009               |
| <i>Mus musculus musculus</i>   | 6.06   | De Magalhaes and Costa 2009               |
| <i>Mus spretus</i>             | 6.37   | Inferred from De Magalhaes and Costa 2009 |
| <i>Drosophila melanogaster</i> | 0.0525 | Lott et al. 2007                          |
| <i>Drosophila teissieri</i>    | NA     | NA                                        |
| <i>Drosophila santomea</i>     | NA     | NA                                        |
| <i>Drosophila yakuba</i>       | 0.0475 | Lott et al. 2007                          |
| <i>Drosophila simulans</i>     | 0.05   | Lott et al. 2007                          |
| <i>Drosophila sechellia</i>    | 0.06   | Lott et al. 2007                          |

| <b>Species</b>                     | <b>adult size (cm)</b> | <b>source</b>                         |
|------------------------------------|------------------------|---------------------------------------|
| <i>Formica fusca</i>               | 14                     | Forel 1890                            |
| <i>Formica sanguinea</i>           | 10                     | Forel 1909                            |
| <i>Formica cunicularia</i>         | 8.5                    | Collingwood 1979                      |
| <i>Formica pratensis</i>           | 10.4                   | Bolton 1995                           |
| <i>Melanargia galathea</i>         | 2.59                   | García-Barros 2000                    |
| <i>Maniola jurtina</i>             | 2.58                   | García-Barros 2000                    |
| <i>Aphantopus hyperantus</i>       | 2.12                   | García-Barros 2000                    |
| <i>Pyronia tithonus</i>            | 1.89                   | García-Barros 2000                    |
| <i>Pyronia bathseba</i>            | 2.04                   | García-Barros 2000                    |
| <i>Mytilus californianus</i>       | 7.5                    | MArine Life Information Network, 2006 |
| <i>Mytilus trossulus</i>           | 7.5                    | MArine Life Information Network, 2006 |
| <i>Mytilus galloprovincialis</i>   | 7.5                    | MArine Life Information Network, 2006 |
| <i>Mytilus edulis</i>              | 7.5                    | MArine Life Information Network, 2006 |
| <i>Allolobophora chlorotica L1</i> | 5.5                    | The Trustees of the Natural           |

|                                    |       |                                                 |
|------------------------------------|-------|-------------------------------------------------|
|                                    |       | History Museum,2010                             |
| <i>Allolobophora chlorotica</i> L2 | 5.5   | The Trustees of the Natural History Museum,2010 |
| <i>Allolobophora chlorotica</i> L4 | 5.5   | The Trustees of the Natural History Museum,2010 |
| <i>Aporrecta icterica</i>          | 9.5   | Sims and Gerard 1985                            |
| <i>Lumbricus terrestris</i>        | 25    | Cloudsley-Thompson and Sankey 1961              |
| <i>Lineus lacteus</i>              | 17.5  | Gontcharoff 1951                                |
| <i>Lineus longissimus</i>          | 1000  | Gontcharoff 1951                                |
| <i>Lineus sanguineus</i>           | NA    | NA                                              |
| <i>Lineus ruber</i>                | 5     | Gontcharoff 1951, Biene 1970                    |
| <i>Homo sapiens</i>                | 163   | Ogden et al. 2004                               |
| <i>Pan troglodytes</i>             | 79.6  | Jones et al. 2009                               |
| <i>Gorilla gorilla</i>             | 137.5 | Wood 1979                                       |
| <i>Papio anubis</i>                | 85    | Fleagle 2013                                    |
| <i>Pongo abelii</i>                | 83    | Groves 1971                                     |
| <i>Macaca mulatta</i>              | 55.5  | Jones et al. 2009                               |
| <i>Anas platyrhynchos</i>          | 55    | Del Hoyo et al. 1992                            |
| <i>Anser cygnoides</i>             | 87    | Del Hoyo et al. 1992                            |
| <i>Meleagris gallopavo</i>         | 90    | Del Hoyo et al. 1992                            |
| <i>Numida meleagris</i>            | 53    | Del Hoyo et al. 1992                            |
| <i>Pavo cristatus</i>              | 95    | Del Hoyo et al. 1992                            |
| <i>Phasianus colchicus</i>         | 57.5  | Del Hoyo et al. 1992                            |
| <i>Parus major</i>                 | 13.5  | Del Hoyo et al. 1992                            |
| <i>Ficedula albicollis</i>         | 13    | Del Hoyo et al. 1992                            |
| <i>Corvus sp.</i>                  | 50.5  | Del Hoyo et al. 1992                            |
| <i>Geospiza difficilis</i>         | 11.5  | Del Hoyo et al. 1992                            |
| <i>Taniopygia guttata</i>          | 10    | Del Hoyo et al. 1992                            |
| <i>Rattus norvegicus</i>           | 21.5  | Burton and Burton 2002                          |
| <i>Microtus arvalis</i>            | 11.1  | Jones et al. 2009                               |
| <i>Microtus ochrogaster</i>        | 15.2  | Jones et al. 2009                               |
| <i>Mus musculus musculus</i>       | 8     | Berry 1970                                      |
| <i>Mus spretus</i>                 | 8.6   | Palomo et al. 2009                              |
| <i>Drosophila melanogaster</i>     | 0.85  | Pitnick et al. 2002                             |
| <i>Drosophila teissieri</i>        | NA    | NA                                              |
| <i>Drosophila santomea</i>         | NA    | NA                                              |

|                             |      |    |
|-----------------------------|------|----|
| <i>Drosophila yakuba</i>    | NA   | NA |
| <i>Drosophila simulans</i>  | 1.03 | NA |
| <i>Drosophila sechellia</i> | NA   | NA |

| <b>Species</b>                     | <b>body mass (g)</b> | <b>source</b>                         |
|------------------------------------|----------------------|---------------------------------------|
| <i>Formica fusca</i>               | NA                   | NA                                    |
| <i>Formica sanguinea</i>           | NA                   | NA                                    |
| <i>Formica cunicularia</i>         | NA                   | NA                                    |
| <i>Formica pratensis</i>           | 0.0119               | Keller & Passera, 1989                |
| <i>Melanargia galathea</i>         | NA                   | NA                                    |
| <i>Maniola jurtina</i>             | 0.05                 | Svärd & Wiklund, 1989                 |
| <i>Aphantopus hyperantus</i>       | 0.0376               | Svärd & Wiklund, 1989                 |
| <i>Pyronia tithonus</i>            | 0,04                 | Corbet, 2000                          |
| <i>Pyronia bathseba</i>            | NA                   | NA                                    |
| <i>Mytilus californianus</i>       | 37.5                 | MArine Life Information Network, 2006 |
| <i>Mytilus trossulus</i>           | 37.5                 | MArine Life Information Network 2006  |
| <i>Mytilus galloprovincialis</i>   | 37.5                 | MArine Life Information Network, 2006 |
| <i>Mytilus edulis</i>              | 37.5                 | MArine Life Information Network, 2006 |
| <i>Allolobophora chlorotica L1</i> | 0.3                  | Butt 1997                             |
| <i>Allolobophora chlorotica L2</i> | 0.3                  | Butt 1997                             |
| <i>Allolobophora chlorotica L4</i> | 0.3                  | Butt 1997                             |
| <i>Aporrecta icterica</i>          | 0.95                 | Bouché 1972                           |
| <i>Lumbricus terrestris</i>        | 7.5                  | Quillin, 1999                         |
| <i>Lineus lacteus</i>              | NA                   | NA                                    |
| <i>Lineus longissimus</i>          | NA                   | NA                                    |
| <i>Lineus sanguineus</i>           | NA                   | NA                                    |
| <i>Lineus ruber</i>                | NA                   | NA                                    |
| <i>Homo sapiens</i>                | 62000                | De Magalhaes and Costa 2009           |
| <i>Pan troglodytes</i>             | 45000                | De Magalhaes and Costa 2009           |
| <i>Gorilla gorilla</i>             | 93000                | De Magalhaes and Costa 2009           |
| <i>Papio anubis</i>                | 14700                | De Magalhaes and Costa 2009           |
| <i>Pongo abelii</i>                | 45000                | De Magalhaes and Costa 2009           |
| <i>Macaca mulatta</i>              | 8240                 | De Magalhaes and Costa 2009           |

|                                |         |                             |
|--------------------------------|---------|-----------------------------|
| <i>Anas platyrhynchos</i>      | 1027    | De Magalhaes and Costa 2009 |
| <i>Anser cygnoides</i>         | 3150    | De Magalhaes and Costa 2009 |
| <i>Meleagris gallopavo</i>     | 4000    | De Magalhaes and Costa 2009 |
| <i>Numida meleagris</i>        | 1479    | De Magalhaes and Costa 2009 |
| <i>Pavo cristatus</i>          | 3375    | De Magalhaes and Costa 2009 |
| <i>Phasianus colchicus</i>     | 999     | De Magalhaes and Costa 2009 |
| <i>Parus major</i>             | 17      | Del Hoyo et al. 1992        |
| <i>Ficedula albicollis</i>     | 12      | Del Hoyo et al. 1992        |
| <i>Corvus sp.</i>              | 499     | Del Hoyo et al. 1992        |
| <i>Geospiza difficilis</i>     | 16.15   | Del Hoyo et al. 1992        |
| <i>Taniopygia guttata</i>      | 10      | Del Hoyo et al. 1992        |
| <i>Rattus norvegicus</i>       | 320     | De Magalhaes and Costa 2009 |
| <i>Microtus arvalis</i>        | 27.5    | De Magalhaes and Costa 2009 |
| <i>Microtus ochrogaster</i>    | 50      | De Magalhaes and Costa 2009 |
| <i>Mus musculus musculus</i>   | 20.5    | De Magalhaes and Costa 2009 |
| <i>Mus spretus</i>             | 17      | Palomo et al. 2009          |
| <i>Drosophila melanogaster</i> | 0.00115 | Klok et al. 2009            |
| <i>Drosophila teissieri</i>    | NA      | NA                          |
| <i>Drosophila santomea</i>     | NA      | NA                          |
| <i>Drosophila yakuba</i>       | NA      | NA                          |
| <i>Drosophila simulans</i>     | NA      | NA                          |
| <i>Drosophila sechellia</i>    | NA      | NA                          |

| <b>Species</b>               | <b>Fecundity (number of offspring per year)</b> | <b>source</b>           |
|------------------------------|-------------------------------------------------|-------------------------|
| <i>Formica fusca</i>         | NA                                              | NA                      |
| <i>Formica sanguinea</i>     | NA                                              | NA                      |
| <i>Formica cunicularia</i>   | NA                                              | NA                      |
| <i>Formica pratensis</i>     | NA                                              | NA                      |
| <i>Melanargia galathea</i>   | NA                                              | NA                      |
| <i>Maniola jurtina</i>       | NA                                              | NA                      |
| <i>Aphantopus hyperantus</i> | 140                                             | Lafranchis et al. 2015  |
| <i>Pyronia tithonus</i>      | 125                                             | Lafranchis et al. 2015  |
| <i>Pyronia bathseba</i>      | NA                                              | NA                      |
| <i>Mytilus californianus</i> | 110000                                          | MArine Life Information |

|                                    |              |                                       |
|------------------------------------|--------------|---------------------------------------|
|                                    |              | Network, 2006                         |
| <i>Mytilus trossulus</i>           | 110000       | MArine Life Information Network, 2006 |
| <i>Mytilus galloprovincialis</i>   | 110000       | MArine Life Information Network, 2006 |
| <i>Mytilus edulis</i>              | 110000       | MArine Life Information Network, 2006 |
| <i>Allolobophora chlorotica</i> L1 | 0.74         | Edwards & Bohlen 1996                 |
| <i>Allolobophora chlorotica</i> L2 | 0.74         | Edwards & Bohlen 1996                 |
| <i>Allolobophora chlorotica</i> L4 | 0.74         | Edwards & Bohlen 1996                 |
| <i>Aporrecta icterica</i>          | 2.67         | Booth et al. 2000                     |
| <i>Lumbricus terrestris</i>        | NA           | NA                                    |
| <i>Lineus lacteus</i>              | NA           | NA                                    |
| <i>Lineus longissimus</i>          | NA           | NA                                    |
| <i>Lineus sanguineus</i>           | NA           | NA                                    |
| <i>Lineus ruber</i>                | NA           | NA                                    |
| <i>Homo sapiens</i>                | 0.0008219178 | De Magalhaes and Costa 2009           |
| <i>Pan troglodytes</i>             | 0.0005479452 | De Magalhaes and Costa 2009           |
| <i>Gorilla gorilla</i>             | 0.0008219178 | De Magalhaes and Costa 2009           |
| <i>Papio anubis</i>                | 0.002191781  | De Magalhaes and Costa 2009           |
| <i>Pongo abelii</i>                | 0.0005479452 | De Magalhaes and Costa 2009           |
| <i>Macaca mulatta</i>              | 0.002739726  | De Magalhaes and Costa 2009           |
| <i>Anas platyrhynchos</i>          | 0.02465753   | De Magalhaes and Costa 2009           |
| <i>Anser cygnoides</i>             | NA           | NA                                    |
| <i>Meleagris gallopavo</i>         | 0.03013699   | De Magalhaes and Costa 2009           |
| <i>Numida meleagris</i>            | 0.02465753   | De Magalhaes and Costa 2009           |
| <i>Pavo cristatus</i>              | 0.01369863   | De Magalhaes and Costa 2009           |
| <i>Phasianus colchicus</i>         | 0.03013699   | De Magalhaes and Costa 2009           |
| <i>Parus major</i>                 | 0.0205       | Tomás et al. 2012                     |
| <i>Ficedula albicollis</i>         | 0.0178       | Gill and Donsker 2017                 |
| <i>Corvus sp.</i>                  | 0.01068      | Holyoak 1967                          |
| <i>Geospiza difficilis</i>         | 0.0329       | Grant and Grant 1980                  |
| <i>Taniopygia guttata</i>          | 0.0151       | Olson et al. 2014                     |
| <i>Rattus norvegicus</i>           | 0.1003562    | De Magalhaes and Costa 2009           |
| <i>Microtus arvalis</i>            | 0.0768       | De Magalhaes and Costa 2009           |
| <i>Microtus ochrogaster</i>        | 0.04164384   | De Magalhaes and Costa 2009           |
| <i>Mus musculus musculus</i>       | 0.104        | De Magalhaes and Costa 2009           |

|                                |     |                    |
|--------------------------------|-----|--------------------|
| <i>Mus spretus</i>             | NA  | NA                 |
| <i>Drosophila melanogaster</i> | 6.3 | Hanson et al. 1929 |
| <i>Drosophila teissieri</i>    | NA  | NA                 |
| <i>Drosophila santomea</i>     | NA  | NA                 |
| <i>Drosophila yakuba</i>       | NA  | NA                 |
| <i>Drosophila simulans</i>     | NA  | NA                 |
| <i>Drosophila sechellia</i>    | NA  | NA                 |

| <b>Species</b>                     | <b>Longevity (years)</b> | <b>source</b>               |
|------------------------------------|--------------------------|-----------------------------|
| <i>Formica fusca</i>               | 20                       | Personnal communication     |
| <i>Formica sanguinea</i>           | 20                       | Personnal communication     |
| <i>Formica cunicularia</i>         | 20                       | Personnal communication     |
| <i>Formica pratensis</i>           | 6                        | Personnal communication     |
| <i>Melanargia galathea</i>         | 1                        | Lafranchis et al. 2015      |
| <i>Maniola jurtina</i>             | 1                        | Lafranchis et al. 2015      |
| <i>Aphantopus hyperantus</i>       | 1                        | Lafranchis et al. 2015      |
| <i>Pyronia tithonus</i>            | 1                        | Lafranchis et al. 2015      |
| <i>Pyronia bathseba</i>            | NA                       | NA                          |
| <i>Mytilus californianus</i>       | 25                       | Bayne and Bayne 1976        |
| <i>Mytilus trossulus</i>           | 25                       | Bayne and Bayne 1976        |
| <i>Mytilus galloprovincialis</i>   | 25                       | Bayne and Bayne 1976        |
| <i>Mytilus edulis</i>              | 25                       | Bayne and Bayne 1976        |
| <i>Allolobophora chlorotica L1</i> | 1.25                     | Edwards & Bohlen 1996       |
| <i>Allolobophora chlorotica L2</i> | 1.25                     | Edwards & Bohlen 1996       |
| <i>Allolobophora chlorotica L4</i> | 1.25                     | Edwards & Bohlen 1996       |
| <i>Aporrecta icterica</i>          | NA                       | NA                          |
| <i>Lumbricus terrestris</i>        | NA                       | NA                          |
| <i>Lineus lacteus</i>              | NA                       | NA                          |
| <i>Lineus longissimus</i>          | NA                       | NA                          |
| <i>Lineus sanguineus</i>           | NA                       | NA                          |
| <i>Lineus ruber</i>                | NA                       | NA                          |
| <i>Homo sapiens</i>                | 123                      | De Magalhaes and Costa 2009 |
| <i>Pan troglodytes</i>             | 59.4                     | De Magalhaes and Costa 2009 |
| <i>Gorilla gorilla</i>             | 60.1                     | De Magalhaes and Costa 2009 |

|                                |      |                             |
|--------------------------------|------|-----------------------------|
| <i>Papio anubis</i>            | 37.5 | De Magalhaes and Costa 2009 |
| <i>Pongo abelii</i>            | 59   | De Magalhaes and Costa 2009 |
| <i>Macaca mulatta</i>          | 40   | De Magalhaes and Costa 2009 |
| <i>Anas platyrhynchos</i>      | 29.1 | De Magalhaes and Costa 2009 |
| <i>Anser cygnoides</i>         | 31   | De Magalhaes and Costa 2009 |
| <i>Meleagris gallopavo</i>     | 13   | De Magalhaes and Costa 2009 |
| <i>Numida meleagris</i>        | NA   | NA                          |
| <i>Pavo cristatus</i>          | 23.2 | De Magalhaes and Costa 2009 |
| <i>Phasianus colchicus</i>     | 27   | De Magalhaes and Costa 2009 |
| <i>Parus major</i>             | 15.4 | De Magalhaes and Costa 2009 |
| <i>Ficedula albicollis</i>     | 9.8  | De Magalhaes and Costa 2009 |
| <i>Corvus sp.</i>              | 19.2 | De Magalhaes and Costa 2009 |
| <i>Geospiza difficilis</i>     | 9    | Oschadleus et al. 2016      |
| <i>Taniopygia guttata</i>      | 12   | De Magalhaes and Costa 2009 |
| <i>Rattus norvegicus</i>       | 3.8  | De Magalhaes and Costa 2009 |
| <i>Microtus arvalis</i>        | 4.8  | De Magalhaes and Costa 2009 |
| <i>Microtus ochrogaster</i>    | 5.3  | De Magalhaes and Costa 2009 |
| <i>Mus musculus musculus</i>   | 4    | De Magalhaes and Costa 2009 |
| <i>Mus spretus</i>             | NA   | NA                          |
| <i>Drosophila melanogaster</i> | 0.16 | Linford et al. 2013         |
| <i>Drosophila teissieri</i>    | NA   | NA                          |
| <i>Drosophila santomea</i>     | NA   | NA                          |
| <i>Drosophila yakuba</i>       | NA   | NA                          |
| <i>Drosophila simulans</i>     | NA   | NA                          |
| <i>Drosophila sechellia</i>    | NA   | NA                          |

#### References :

- Bayne BL, Salkeld PN, Worrall CM. 1983. Reproductive effort and value in different populations of the marine mussel, *Mytilus edulis* L. *Oecologia* 59:18–26.
- Bayne Brian Leicester, Bayne Brian L. 1976. *Marine mussels: their ecology and physiology*. Cambridge University Press
- Berry RJ. 1970. The natural history of the house mouse. *Field studies* 3:219–262.
- Bierne J. 1970. Recherches sur la différenciation sexuelle au cours de l'ontogenèse et de la régénération chez le némertien *Lineus ruber* (Müller).
- J. Bierne. in *Reprod. Biol. Invertebr.* 1 Oogenesis Oviposition Oosorption 146–167 (John Wiley & Sons Ltd, 1983).
- Bolton B. 1995. A new general catalogue of the ants of the world.
- Booth LH, Heppelthwaite VJ, O'halloran K. 2000. Growth, development and fecundity of the earthworm *Aporrectodea caliginosa* after exposure to two organophosphates. In: *New Zealand Plant Protection Volume 53*, 2000.

Proceedings of a conference, Commodore Hotel, Christchurch, New Zealand, 8-10 August 2000. New Zealand Plant Protection Society. p. 221–225.

- Bouché MB. 1972. Lombriciens de France: écologie et systématique.
- Burton M, Burton R. 2002. International Wildlife Encyclopedia: Index volume. Marshall Cavendish
- Butt KR. 1997. Reproduction and growth of the earthworm *Allolobophora chlorotica* (Savigny, 1826) in controlled environments. *Pedobiologia* 41:369–374.
- Cloudsley-Thompson JL, Sankey J. 1961. Land invertebrates. A guide to British worms, molluscs and arthropods (excluding insects).
- Collingwood CA. 1979. The Formicidae (Hymenoptera) of Fennoscandia and Denmark. Scandinavian Science Press.
- Corbet SA. 2000. Butterfly nectaring flowers: butterfly morphology and flower form. *Entomologia Experimentalis et Applicata*, 96:289-298.
- De Magalhaes JP, Costa J. 2009. A database of vertebrate longevity records and their relation to other life-history traits. *Journal of evolutionary biology* 22:1770–1774.
- Del Hoyo J, Elliot A, Sargatal J. 1992. Handbook of the Birds of the World. Barcelona: Lynx Editions.”. Jutglar, Francesc.
- Edwards CA, Bohlen P J. 1996. Biology and Ecology of Earthworms. London: Chapman and Hall
- Eijsackers H. 2011. Earthworms as colonizers of natural and cultivated soil environments. *Applied Soil Ecology* 50:1–13.
- Fleagle JG. 2013. Primate adaptation and evolution. Academic Press
- Forel A. 1890. Fourmis de Tunisie et de l’Algérie orientale. *Annales*.
- Forel A. 1909. Fourmis d’Espagne. Récoltées par MO Vogt et Mme Cécile Vogt, docteurs en médecine. *Annales*.
- García-Barros E. 2000. Egg size in butterflies (Lepidoptera: Papilionoidea and Hesperiiidae): a summary of data. *Journal of Research on the Lepidoptera* 35:90–136.
- Gill F, Donsker D. 2017. IOC World Bird List (v 7.2), 10.14344/IOC. ML
- Gontcharoff M. 1951. Biologie de la régénération et de la reproduction chez quelques Lineidae de France. *Annales des Sciences Naturelles, Zoologie, Serie 11* 13:149–235.
- Grant PR, Grant BR. 1980. The breeding and feeding characteristics of Darwin’s finches on Isla Genovesa, Galapagos. *Ecological Monographs* 50:381–410.
- Groves CP. 1971. *Pongo pygmaeus*. *Mammalian species*:1–6.
- Hanson FB, Ferris FR. 1929. A quantitative study of fecundity in *Drosophila melanogaster*. *Journal of Experimental Zoology*. 543:485-506.
- Holyoak D. 1967. Breeding biology of the Corvidae. *Bird Study* 14:153–168.
- Jones KE, Bielby J, Cardillo M, Fritz SA, O’Dell J, Orme CDL, Safi K, Sechrest W, Boakes EH, Carbone C. 2009. PanTHERIA: a species-level database of life history, ecology, and geography of extant and recently extinct mammals. *Ecology* 90:2648–2648.
- Keller, L. and Passera, L., 1989. Size and fat content of gynes in relation to the mode of colony founding in ants (Hymenoptera; Formicidae). *Oecologia*, 802 :236-240.



- Klok CJ, Hubb AJ, Harrison JF. 2009. Single and multigenerational responses of body mass to atmospheric oxygen concentrations in *Drosophila melanogaster*: evidence for roles of plasticity and evolution. *Journal of evolutionary biology*. 12:2496-504.
- Lafranchis, T., Jutzeler, D., Guillosson, J.Y., Kan, P. and Kan, B. 2015. *La vie des papillons: écologie, biologie et comportement des Rhopalocères de France*. Diatheo.
- Linford NJ, Bilgir C, Ro J, Pletcher SD. 2013. Measurement of lifespan in *Drosophila melanogaster*. *Journal of visualized experiments* 71.
- Lott SE, Kreitman M, Palsson A, Alekseeva E, Ludwig MZ. 2007. Canalization of segmentation and its evolution in *Drosophila*. *Proceedings of the National Academy of Sciences*. 10426:10926-31.
- MARine Life Information Network. MarLIN BIOTIC (Biological Traits Information Catalogue).(2006). at <[www.marlin.ac.uk/biotic/](http://www.marlin.ac.uk/biotic/)>
- Ogden CL, Fryar CD, Carroll MD, Flegal KM. 2004. Mean body weight, height, and body mass index: United States 1960-2002. Department of Health and Human Services, Centers for Disease Control and Prevention, National Center for Health Statistics Washington, DC
- Olson CR, Wirthlin M, Lovell PV, Mello CV. 2014. Proper care, husbandry, and breeding guidelines for the zebra finch, *Taeniopygia guttata*. *Cold Spring Harbor Protocols* 2014:pdb. Prot084780.
- Oschadleus HD, Schultz B and Schultz SJ. 2016. Longevity of the Helmeted Guineafowl *Numida meleagris*. *Biodiversity Observations*,1-3.
- Palomo LJ, Justo ER, Vargas JM. 2009. *Mus spretus* (Rodentia: muridae). *Mammalian species*:1–10.
- Pitnick S, García-González F. 2002. Harm to females increases with male body size in *Drosophila melanogaster*. *Proceedings of the Royal Society of London. Series B: Biological Sciences*. 269(1502):1821-8.
- Quillin KJ. 1999. Kinematic scaling of locomotion by hydrostatic animals: ontogeny of peristaltic crawling by the earthworm *Lumbricus terrestris*. *Journal of Experimental Biology*, 202 :661-674.
- Seifert B. 2002. A taxonomic revision of the *Formica cinerea* group (Hymenoptera: Formicidae). *Abhandlungen und Berichte des Naturkundemuseums Görlitz* 74:245–272.
- Sims RW, Gerard BM. 1985. *Earthworms: keys and notes for the identification and study of the species*. Brill Archive
- Svärd L, and C Wiklund. 1989. Mass and production rate of ejaculates in relation to monandry/polyandry in butterflies. *Behavioral Ecology and Sociobiology* 24.6: 395-402.
- The Trustees of the Natural History Museum. Available from: <http://www.nhm.ac.uk/discover.html>
- Tomás G, Barba E, Merino S, Martínez J. 2012. Clutch size and egg volume in great tits (*Parus major*) increase under low intensity electromagnetic fields: a long-term field study. *Environmental research* 118:40–46.
- Wood BA. 1979. Relationship between body size and long bone lengths in Pan and Gorilla. *American journal of physical anthropology* 50:23–25.

**Table S5: Values and sources of the life history traits used in this study.**

One of the two estimates of the adaptive rate at group level used in this study,  $\omega_{a[A]}$ , was obtained by calculating the across-species arithmetic mean of  $\omega_{na}$  within a group, then subtracting this average from  $\omega$ . Here we show that  $\omega_{a[A]}$  is an unbiased estimate of the adaptive rate with fluctuating population size if the pace of fluctuations is sufficiently slow. We justify this strategy by making the hypothesis that the present variation in population sizes between closely related species represents well the possible range of population size fluctuations that one population experienced during the time period of its divergence with its sister species. Under our model,  $\omega_{na}$  for an individual species is

$$(1) \quad \omega_{na} = (\widehat{D}_N^{na}/L_N)/(D_S/L_S),$$

where  $\widehat{D}_N^{na}$  is the expected number of non-synonymous substitutions:

$$(2) \quad \widehat{D}_N^{na} = 2L_N N_e t \mu \int_{-\infty}^0 \phi(s) f(N_e, s) ds$$

where  $L_N$  is the number of non-synonymous sites,  $t$  is the divergence time,  $\phi(s)$  is the fixation probability of a mutation with a selection coefficient  $s$ , and  $f(N_e, s)$  is the DFE, in a population of size  $N_e$ .

Then, if we have sampled  $n$  closely related species, and we call  $N_{e1}, N_{e2}, N_{e3}, \dots, N_{en}$  their respective present effective population size, then, making the hypothesis that the shape of the DFE and the mutation rate  $\mu$  remains constant in time, one can express the expected number of non-synonymous substitutions,  $\widehat{D}_N^{na}$ , as :

$$(3) \quad \widehat{D}_N^{na} = \frac{t}{n} \sum_i^n 2L_N N_{ei} \mu \int_{-\infty}^0 \phi(s) f(N_{ei}, s) ds$$

Equation (3) is equivalent to assuming that, as the considered species were diverging, they have randomly fluctuated between the  $n$  regimes of selection/drift we currently observe, spending the same amount of time in the  $n$  regimes. Under this assumption, the group level  $\widehat{D}_N^{na}$  is simply the arithmetic mean of  $\widehat{D}_N^{na}$  estimated across individual species. Then, using  $L_N, L_S$  and  $D_S$  of the total subtree of the considered species, we can use the arithmetic mean of  $\omega_{na}$  across individual species,  $\omega_{na[A]}$ , as representative of the average non-adaptive selective regime during their divergence. Subtracting  $\omega_{na[A]}$  from the  $dN/dS$  ratio estimated using all branches of the tree, we obtain an estimate of the adaptive substitution rate for the whole group,  $\omega_{a[A]}$ .

**Box S1: Rationale of the estimation of the per group adaptive substitution rate “A”.**

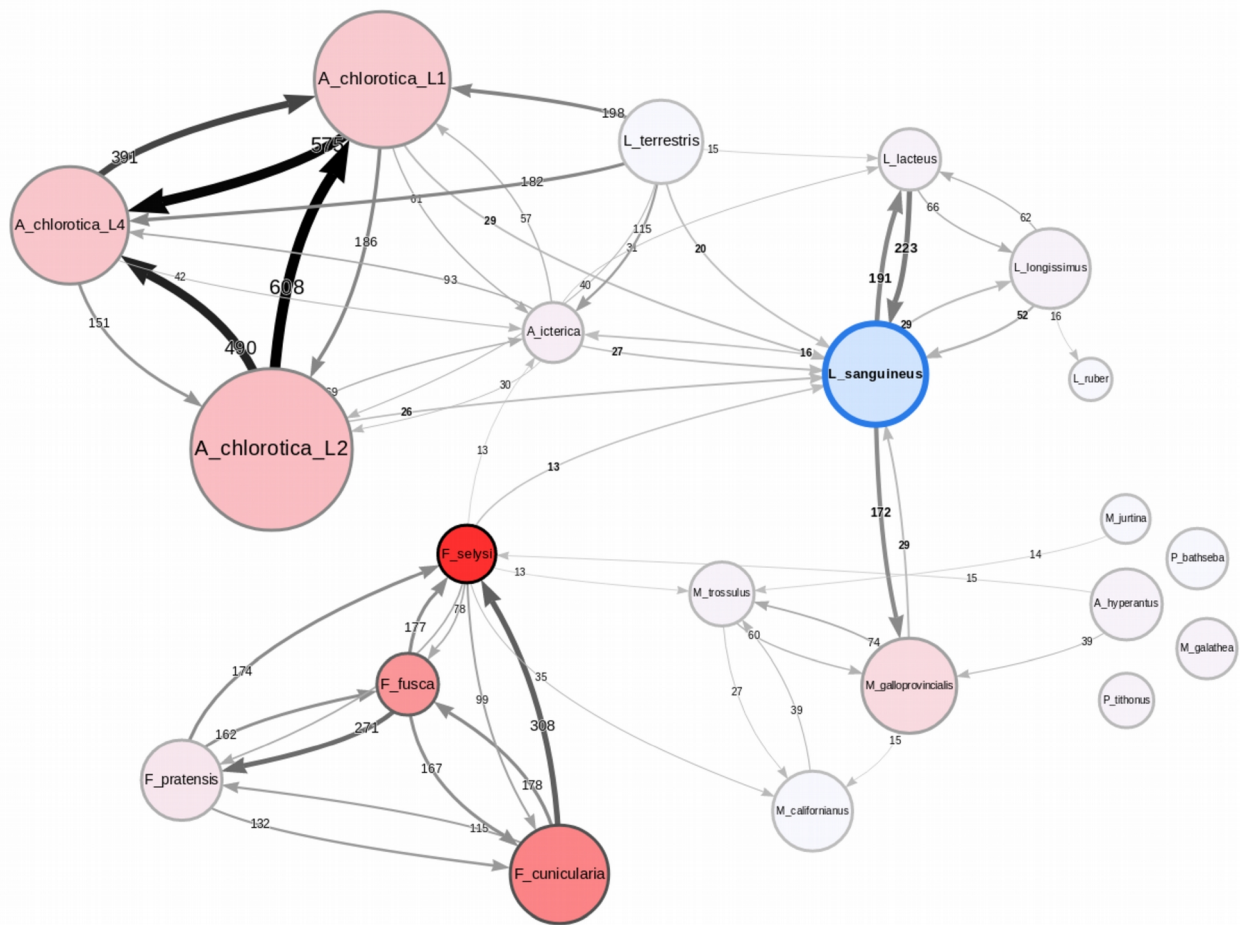

**Figure S1: Cross contamination network for de novo assemblies from exon capture.**

Circles represent the assemblies, and arrows and their corresponding numbers represent the number of cross contaminants. Most cross contamination events occur between closely-related species and are therefore likely false positive cases.

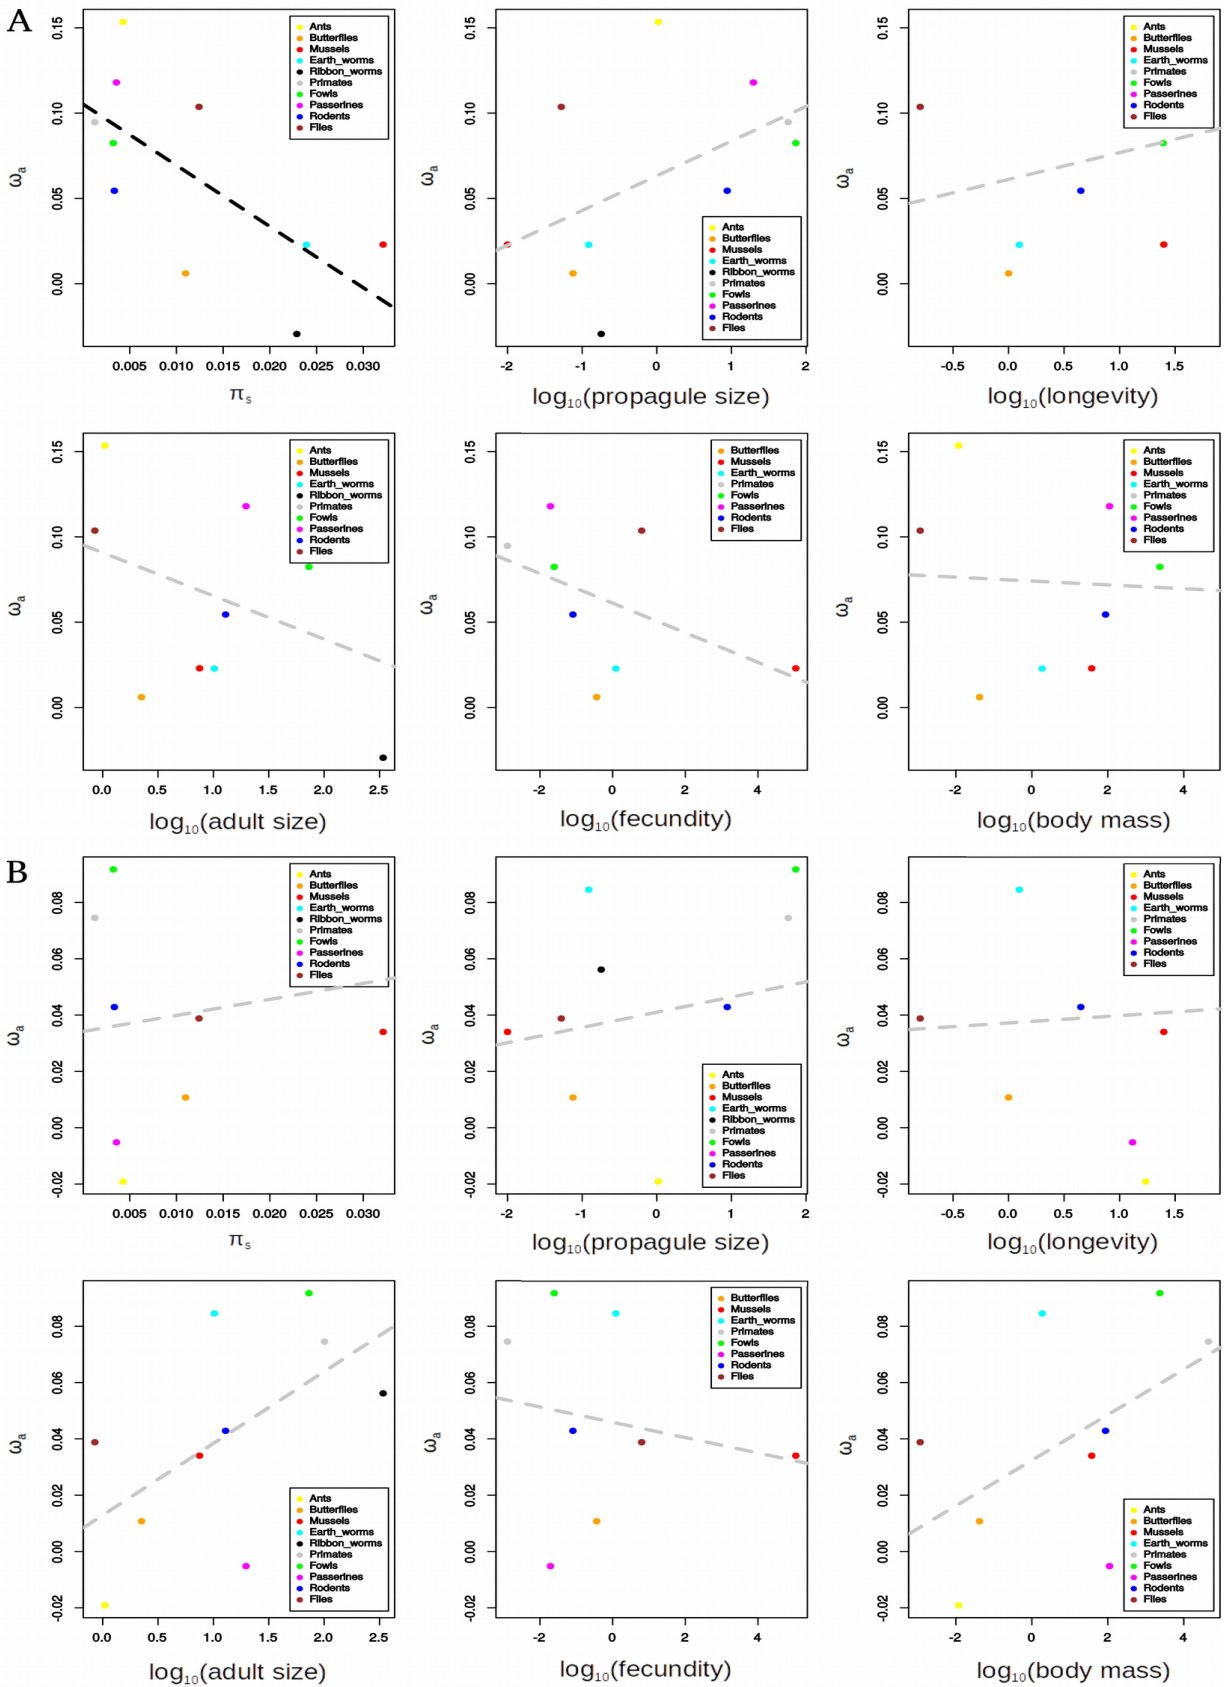

**Figure S2: Relationship between  $\omega_{a[P]}$  and  $\pi_s$  and  $\log_{10}$  transformed life history traits.**

$\omega_{a[P]}$  is estimated using all mutations and substitutions (A) or using only GC-conservative mutations and substitutions (B). Group level  $\pi_s$  and life history traits are estimated by averaging species level estimates across closely related species. Black dotted lines represent significant regressions across taxonomic groups and grey dotted lines non-significant ones.

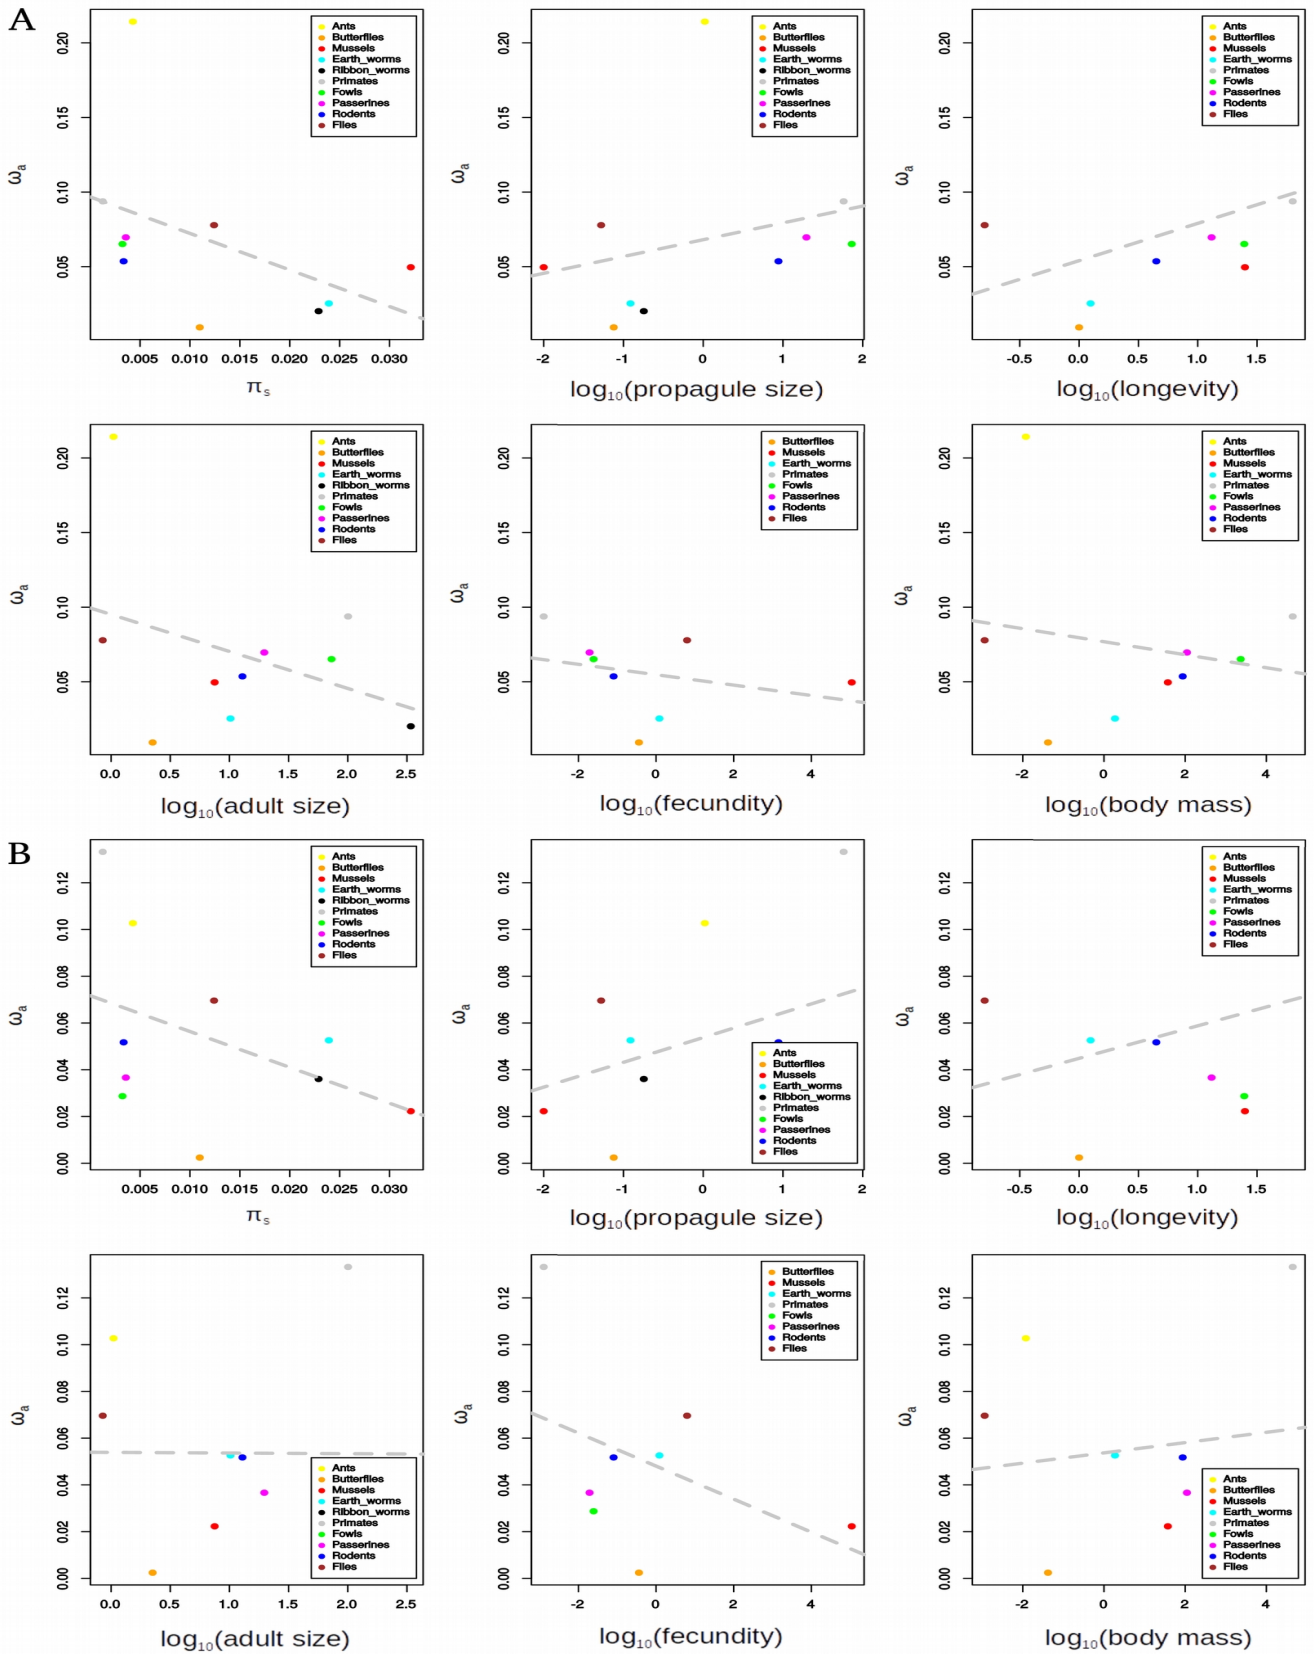

**Figure S3: Relationship between  $\omega_{a[A]}$  and  $\pi_s$  and  $\log_{10}$  transformed life history traits.**

$\omega_{a[A]}$  is estimated using all mutations and substitutions (A) or using only GC-conservative mutations and substitutions (B). Group level  $\pi_s$  and life history traits are estimated by averaging species level estimates across closely related species. Black dotted lines represent significant regressions across taxonomic groups and grey dotted lines non-significant ones.

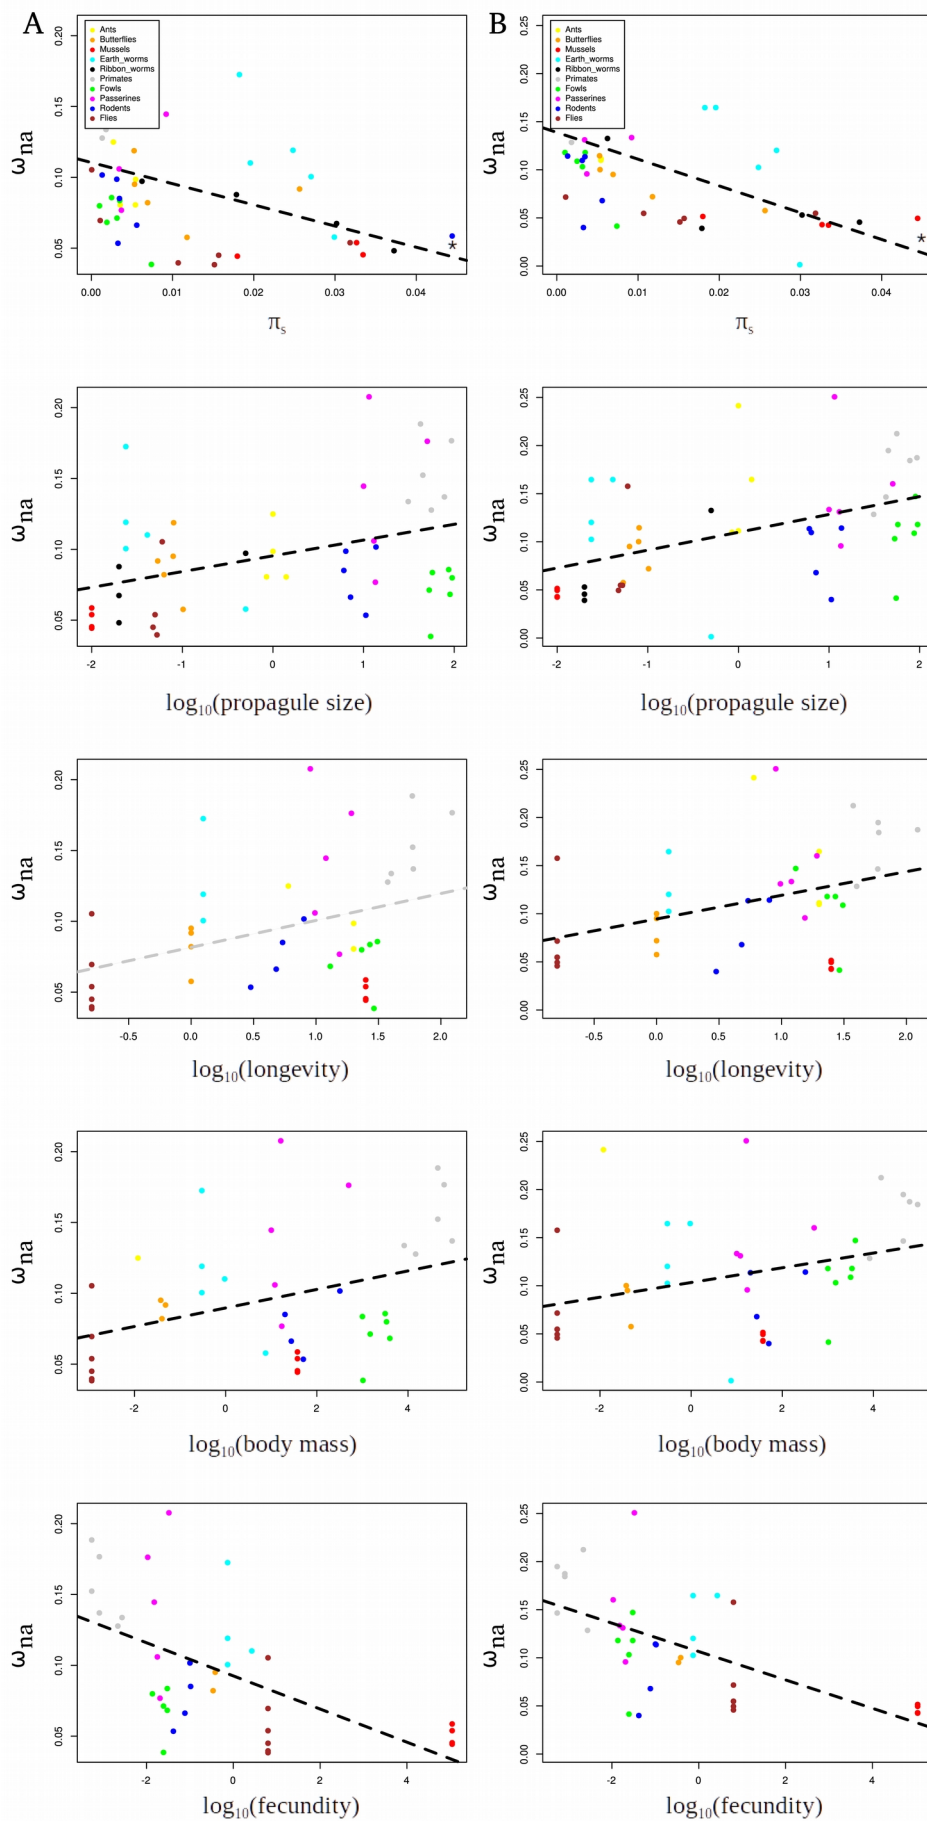

**Figure S4: Relationship between species-level  $\omega_{na}$  and  $\pi_s$  or  $\log_{10}$  transformed life history traits.**  $\omega_{na}$  is estimated using all mutations and substitutions (A) or using only GC-conservative mutations and substitutions (B). Black dotted lines represent significant regressions across taxonomic groups and grey dotted lines non-significant ones.

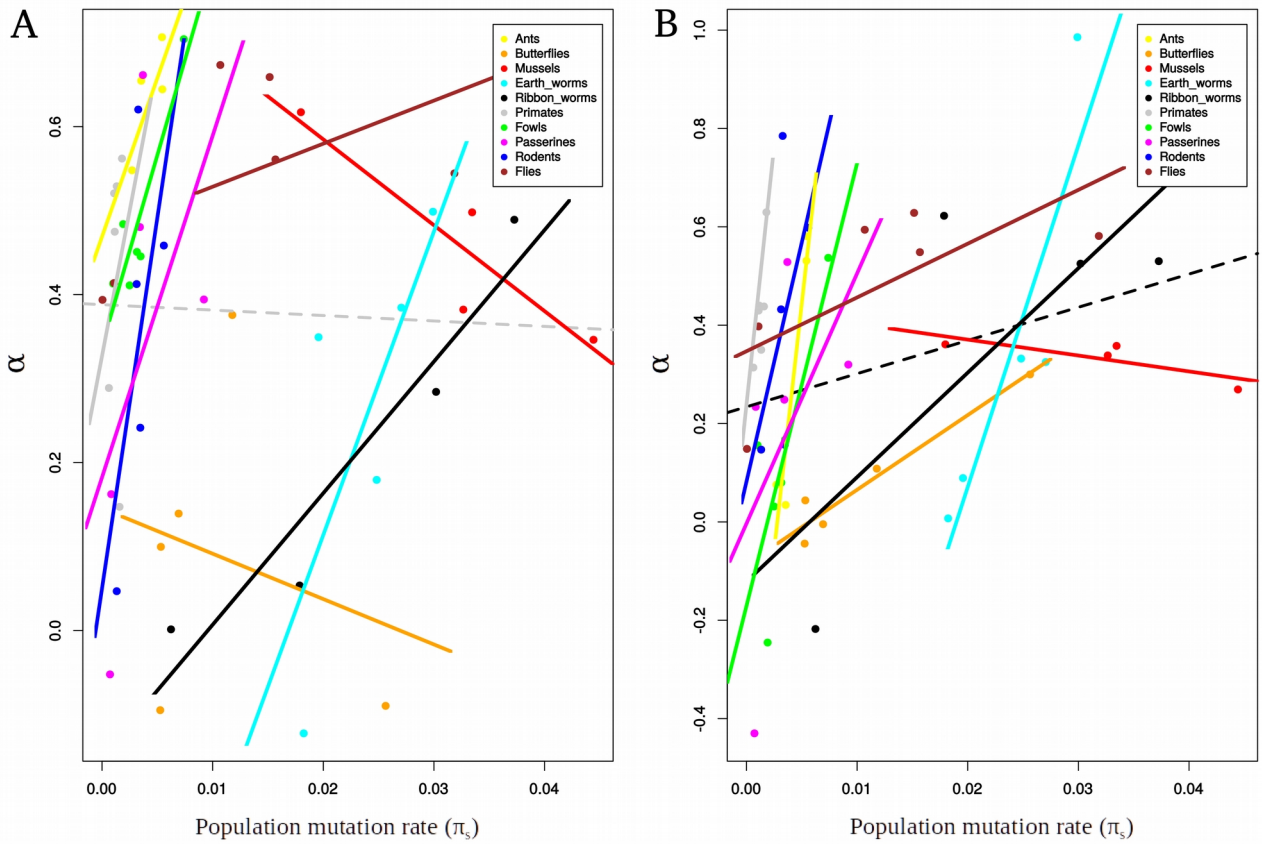

**Figure S5: Relationship between species-level  $\alpha$  and  $\pi_s$ .**

$\alpha$  is estimated using all mutations and substitutions (A) or using only GC-conservative mutations and substitutions (B). The dotted line represents the regression across all species, and full lines represent the regression within each taxonomic groups. Black dotted lines represent significant regressions across taxonomic groups and grey dotted lines non-significant ones.

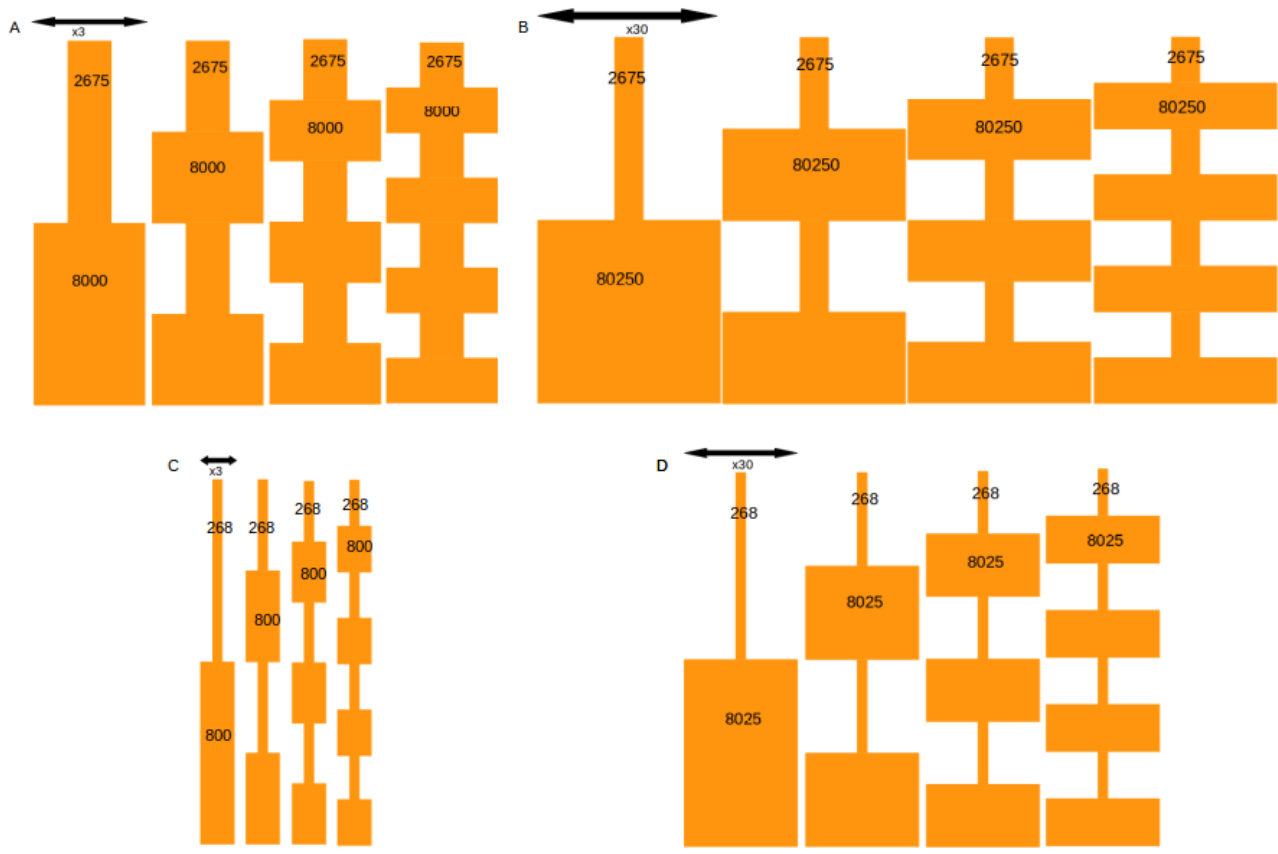

**Figure S6: Design of the simulations of fluctuation of population size.**

A: three fold ratio between low and high population size and high long-term population size.

B: thirty fold ratio between low and high population size and high long-term population size.

C: three fold ratio between low and high population size and low long-term population size.

D: thirty fold ratio between low and high population size and low long-term population size.



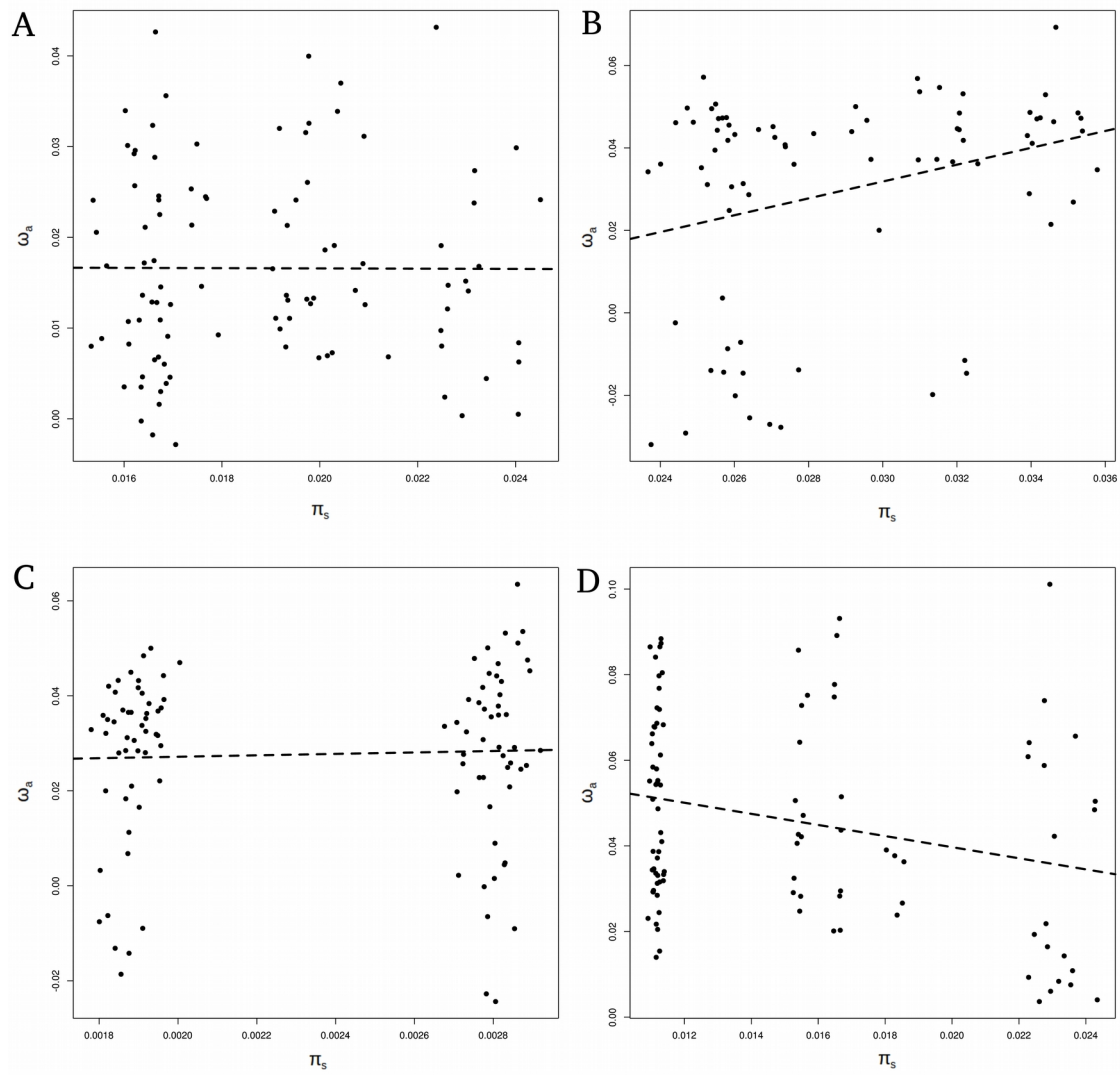

**Figure S7: Relationship between  $\omega_a$  and  $\pi_s$  in simulated scenarios of fluctuating population size.**

A: three fold ratio between low and high population size and high long-term population size (scenario A in figure S1)

B: thirty fold ratio between low and high population size and high long-term population size (scenario B in figure S1)

C: three fold ratio between low and high population size and low long-term population size (scenario C in figure S1)

D: thirty fold ratio between low and high population size and low long-term population size (scenario D in figure S1)
